# Supplementary material for: Aldehyde dehydrogenase 2 activation in aged heart improves the autophagy by reducing the carbonyl modification on SIRT1
Source: PubMed Central journal article supplement (PMC4823027; doi:10.18632/oncotarget.6814), 2016-01-03
Supplement: oncotarget-07-2175-s001.pdf [file oncotarget-07-2175-s001.pdf]

## Aldehyde dehydrogenase 2 activation in aged heart improves the autophagy by reducing the carbonyl modification on SIRT1

### Supplementary Material

#### Supplementary Table 1

##### General features of young (4 mo) and aged (22 mo) mice

| Mouse group                           | Young       | Aged        |
|---------------------------------------|-------------|-------------|
| Body weight(BW, g)                    | 24.2 ± 1.5  | 32.3 ± 0.9* |
| Heart weight (HW, mg)                 | 140 ± 4     | 165 ± 6*    |
| HW/BW (mg/g)                          | 5.78 ± 0.26 | 5.11 ± 0.66 |
| Normalized LV mass (mg/g)             | 2.17±0.5    | 2.25±0.3    |
| Fractional shortening (%)             | 48.6±1.46   | 46.5±3.4    |
| Heart rate (beats.min <sup>-1</sup> ) | 465±12      | 458±32      |

Values are means ± SEM, n=10 for both groups, \**P*<0.05 vs Young

## Supplementary Table 2

### General features of WT and ALDH2 KO mice

| Mouse group                            | WT         | ALDH2 KO    |
|----------------------------------------|------------|-------------|
| Body weight (g)                        | 25.8 ± 1.2 | 23.5 ± 1.5  |
| Heart weight (mg)                      | 145± 9     | 143± 11     |
| Heart weight/body weight ratio (mg/g)  | 5.62± 0.51 | 6.08 ± 0.42 |
| Liver weight (g)                       | 1.35±0.03  | 1.32±0.05   |
| Liver weight/body weight ratio (mg/g)  | 51.2±2.50  | 56.2±3.33   |
| Kidney weight (mg)                     | 355±8      | 338±12      |
| Kidney weight/body weight ratio (mg/g) | 13.75±0.67 | 14.38±0.80  |
| Fractional shortening (%)              | 47.6±1.5   | 42.3±2.3    |
| Heart Rate (beats.min <sup>-1</sup> )  | 452±18     | 460±30      |

Values are means ± SEM, n=10 for each groups
